# Supplementary material for: Differentiating the impact of nitrogen chemical states on optical properties of nitrogen-doped graphene quantum dots
Source: Royal Society of Chemistry journal article supplement (doi:10.1039/c7ra09252k), 2017-01-01
Supplement: c7ra09252k1.pdf [file c7ra09252k1.pdf]

## Supporting Information

### Experimental Methods

#### Materials

Carbon nano-onions were prepared by the thermal annealing of commercially available nanodiamond powders (Nanostructured and Amorphous Materials, Inc., Houston, TX) at 1650 °C for 1h under the flow of helium in a graphitization furnace. H<sub>2</sub>SO<sub>4</sub>, HNO<sub>3</sub>, K<sub>2</sub>CO<sub>3</sub> and NH<sub>4</sub>OH were purchased from Sigma-Aldrich. The 200 mL stainless steel hydrothermal reactor houses a PTFE sample chamber in which the ox-GQDs were reacted with aqueous ammonia. All samples were dialyzed against deionized water in 1 kDa MWCO dialysis bags purchased from Spectrum Labs.

#### Instrumentation and Sample Preparation

The size of GQDs and N-GQDs were characterized by a JEOL JEM-2200FS, 200 kV electron acceleration voltage TEM and the thickness was measured with a Park Systems XE-70 AFM operating in non-contact mode. TEM samples were prepared by dipping a TEM copper grid (lacey carbon support film) into a dilute solution of GQD sample. AFM samples were prepared by dropping 5 µL GQD sample onto a mica substrate disc and spin casting to dry. FTIR spectra were taken with a Thermo Scientific Model Nicolet 6700 FTIR Spectrometer operating with a diamond ATR crystal. FTIR samples were prepared by dropping 5 µL GQD samples onto the ATR crystal and drying in an oven until a thick film was observed. The XPS characterization was conducted with a Thermo Scientific Model K-Alpha XPS instrument. The XPS samples were prepared by dropping 5 µL of GQD sample onto a silicon wafer and drying between depositions until a thick film could be observed. Absorption spectra were collected with a Thermo Scientific Evolution 201 Spectrophotometer and emission spectra were recorded with a Jobin-Yvon

Spectromax 4 Spectrofluorometer. Optical properties were measured using a quartz cuvette with 10 mm

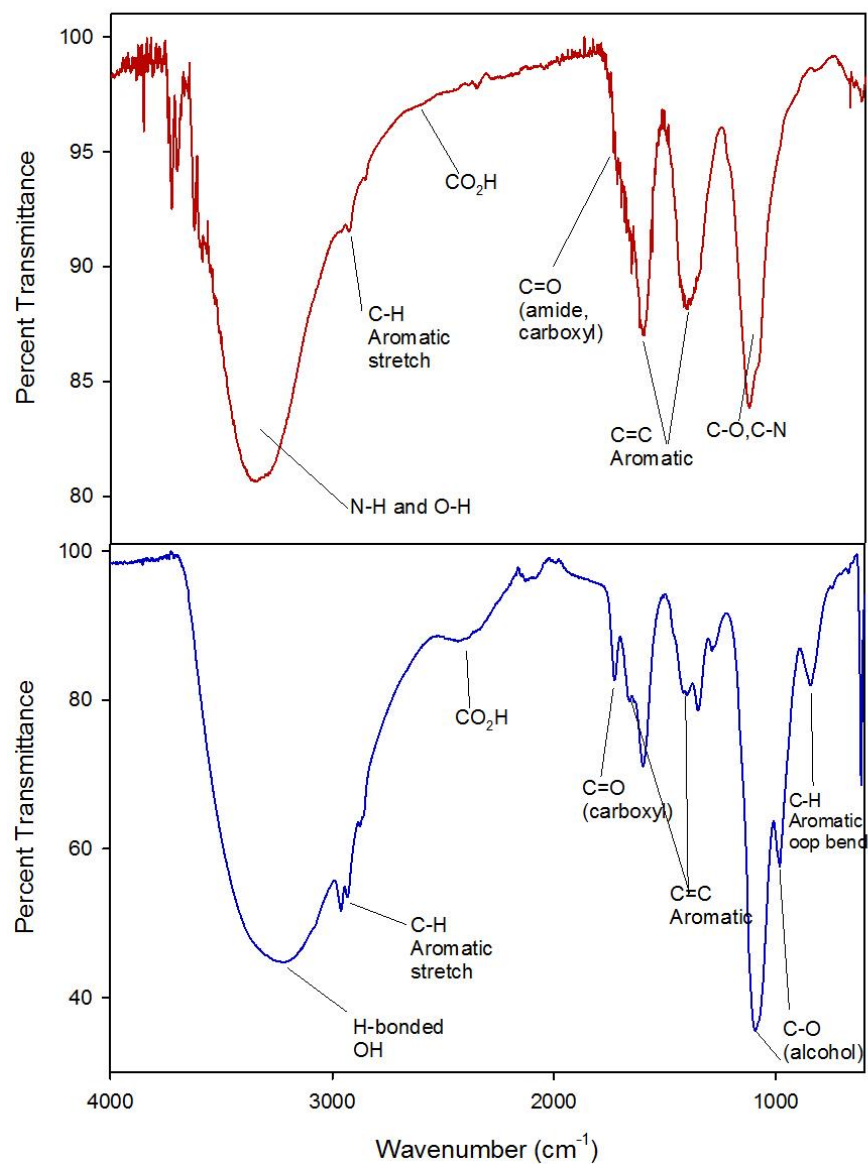

**Figure S1:** FTIR Spectra of N-GQD-150 (top) and ox-GQD (bottom).

path length.

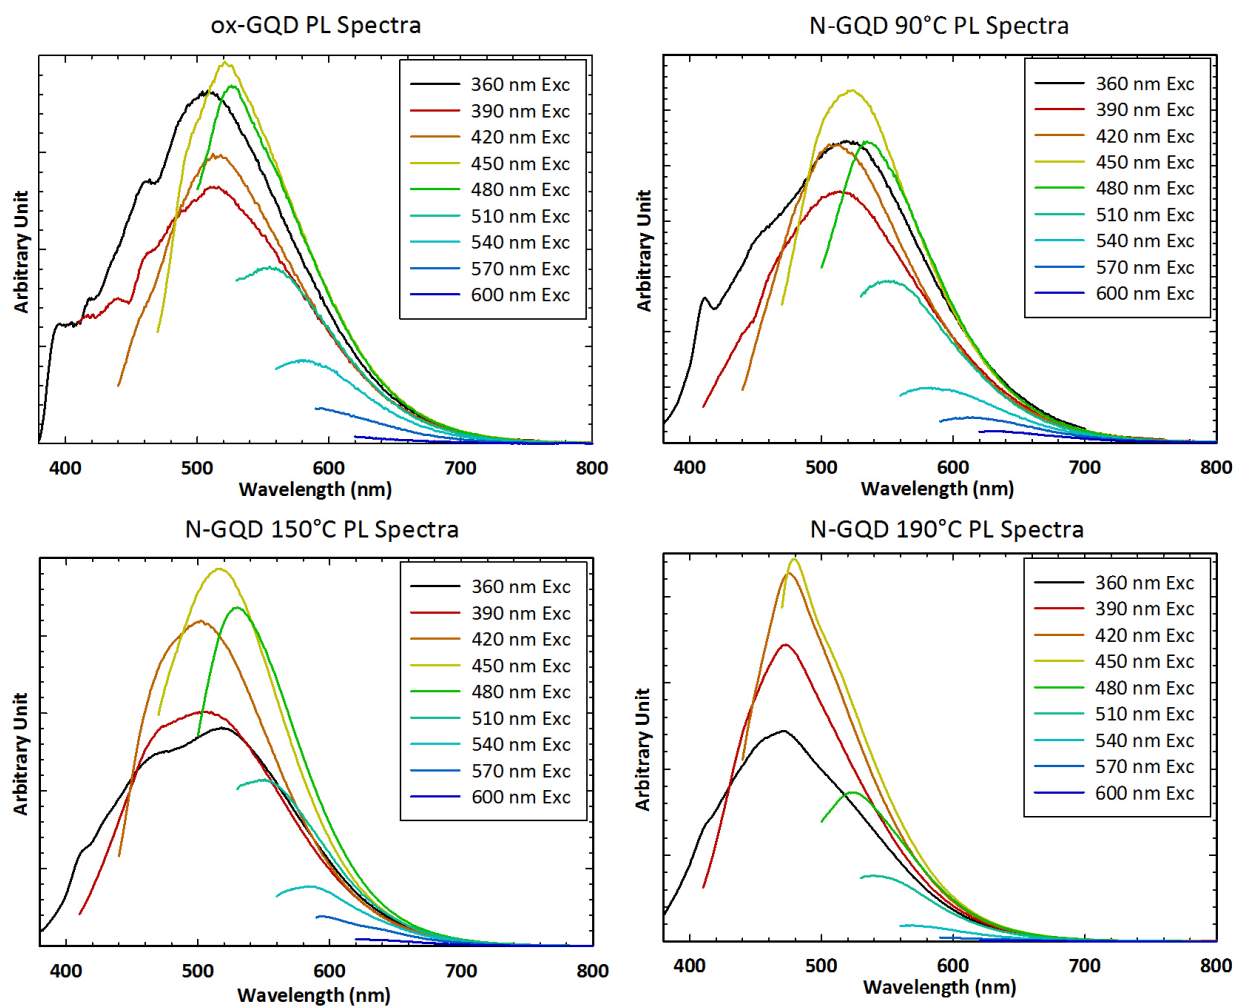

**Figure S2:** Emission spectra of ox-GQD (top left), N-GQD-90 (top right), N-GQD-150 (bottom left), and N-GQD-190 (bottom right).

| Experimental Work           | Year Published | ~398.5 eV              | ~399.5 eV             | ~400 eV               | >401 eV                |
|-----------------------------|----------------|------------------------|-----------------------|-----------------------|------------------------|
| Tetsuka et al. <sup>7</sup> | 2012           | ---                    | Amine N (399.7 eV)    | ---                   | ---                    |
| Dai et al. <sup>9</sup>     | 2014           | ---                    | Pyrrolic N (399.7 eV) | ---                   | Graphitic N (401.6 eV) |
| Li et al. <sup>10</sup>     | 2012           | Pyridinic N (398.5 eV) | ---                   | ---                   | Pyrrolic N (401 eV)    |
| NIST Database <sup>25</sup> | 2012           | Pyridinic N (398.6 eV) | Amine N (399.4 eV)    | Pyrrolic N (399.9 eV) | Graphitic N (401.3 eV) |
| This work                   | 2015           | Pyridinic N (398.5 eV) | Amine N (399.3 eV)    | Pyrrolic N (400.2 eV) | Graphitic N (401.3 eV) |

**Table S1:** XPS N1s peak assignments in recent literature and this work.
